# Supplementary material for: Increased Safety Behavior and COVID-19-Related Fear in Adults with Cystic Fibrosis during the Pandemic
Source: MDPI journal article supplement (doi:10.3390/healthcare10050858), 2022-05-06
Supplement: s1 [file s1]

Table S1. Regression coefficients predicting ASB.

|                                                        | <i>Estimates</i> | <i>CI</i>    | <i>p</i> |
|--------------------------------------------------------|------------------|--------------|----------|
| Intercept                                              | 2.42             | .97 – 3.88   | .001**   |
| Diagnosis of CF                                        | 0.51             | .12 – .90    | .011*    |
| COVID-19-related fear                                  | 0.32             | .19 – .46    | <.001**  |
| Subjective level of information                        | 0.32             | .09 – .54    | .006**   |
| Age: 25-34, ref: 18-24                                 | -.06             | -.58 – .46   | .829     |
| Age: 35-44, ref: 18-24                                 | -.3              | -.84 – .23   | .267     |
| Age: 45-54, ref: 18-24                                 | -.2              | -.70 – .30   | .428     |
| Age: 55-64, ref: 18-24                                 | -.82             | -2.10 – .46  | .207     |
| Age: 65-74, ref: 18-24                                 | -1.17            | -1.78 – -.55 | <.001**  |
| Education: high-school degree (ref: university degree) | .32              | -.08 – .72   | .116     |
| Education: <i>Realschule</i> (ref: university degree)  | -.13             | -.73 – .46   | .653     |
| Education: <i>Hauptschule</i> (ref: university degree) | -.19             | -1.35 – .96  | .742     |
| Education: other (ref: university degree)              | .41              | -.22 – 1.05  | .199     |
| Gender: male (ref: Female)                             | -.31             | -1.01 – .39  | .38      |

Note. Dependent Variable: adherent safety behavior (ASB). Total  $R^2=0.414$ ,  $F(13, 124)=6.936$ ,  $p\leq.001$ ,  $n=138$ . \*\*  $p\leq.01$

\*  $p\leq.05$

Table S2. Regression Coefficients Predicting DSB.

|                                                        | <i>Estimates</i> | <i>CI</i>    | <i>p</i> |
|--------------------------------------------------------|------------------|--------------|----------|
| Intercept                                              | 1.04             | -1.13 – 3.21 | .344     |
| Diagnosis of CF                                        | .76              | .23 – 1.30   | .005**   |
| COVID-19-related fear                                  | .22              | .07 – .37    | .004**   |
| Subjective level of information                        | .03              | -.28 – .33   | .871     |
| Age: 25-34, ref: 18-24                                 | .19              | -.54 – .91   | .614     |
| Age: 35-44, ref: 18-24                                 | .22              | -.57 – 1.02  | .579     |
| Age: 45-54, ref: 18-24                                 | .14              | -.74 – 1.02  | .753     |
| Age: 55-64, ref: 18-24                                 | .39              | -.78 – 1.57  | .509     |
| Age: 65-74, ref: 18-24                                 | -.48             | -1.98 – 1.03 | .531     |
| Education: high-school degree (ref: university degree) | .29              | -.39 – .97   | .394     |
| Education: <i>Realschule</i> (ref: university degree)  | .18              | -.69 – 1.05  | .681     |
| Education: <i>Hauptschule</i> (ref: university degree) | -.38             | -1.74 – .97  | .574     |
| Education: other (ref: university degree)              | .7               | -.36 – 1.76  | .195     |
| Gender: male (ref: Female)                             | .66              | -.24 – 1.56  | .148     |

Note. Dependent Variable: dysfunctional safety behavior (DSB). Total  $R^2=0.196$ ,  $F(13, 124)=3.169$ ,  $p\leq.001$ ,  $n=138$ .

\*\*  $p\leq.01$  \*  $p\leq.05$
